# Supplementary material for: Electrochemical CO2 conversion technologies: state-of-the-art and future perspectives
Source: Royal Society of Chemistry journal article supplement (doi:10.1039/d3se00775h), 2023-01-01
Supplement: d3se00775h1.pdf [file d3se00775h1.pdf]

## SUPPORTING INFORMATION FILE FOR

### Electrochemical CO<sub>2</sub> conversion technologies: state-of-the-art and future perspective

Remko J. Detz,<sup>\*a</sup> Claire J. Ferchaud,<sup>b</sup> Arie J. Kalkman,<sup>c</sup> Jasmin Kemper,<sup>d</sup> Carlos Sánchez Martínez,<sup>c</sup> Marija Saric,<sup>b</sup> and Manoj V. Shinde<sup>b</sup>

\* Correspondence: remko.detz@tno.nl

<sup>a</sup> Energy Transition Studies (ETS), Netherlands Organization for Applied Scientific Research (TNO), Radarweg 60, 1043 NT Amsterdam, The Netherlands.

<sup>b</sup> Sustainable Technologies for Industrial Processes (STIP), Netherlands Organization for Applied Scientific Research (TNO), P.O. Box 1, 1755 ZG Petten, The Netherlands.

<sup>c</sup> Sustainable Process and Energy Systems (SPES), Netherlands Organization for Applied Scientific Research (TNO), P.O. Box 6012, 2600 JA Delft, The Netherlands.

<sup>d</sup> IEA Greenhouse Gas R&D Programme, Pure Offices, Cheltenham Office Park, Hatherley Lane, Cheltenham, GLOS, GL51 6SH, United Kingdom

Electrochemistry may appear an attractive approach to convert a stable molecule like CO<sub>2</sub> into an array of carbon-based products, such as carbon monoxide (CO), formic acid (CHOOH), and ethylene (C<sub>2</sub>H<sub>4</sub>). Here we describe the methodology to investigate six routes to electrochemically convert CO<sub>2</sub> to produce CO (2 routes), syngas (1 route), formic acid (1 route), and ethylene (2 routes). The two key technologies we investigate for these routes, i.e. low temperature electrolysis and high temperature electrolysis, are at a relatively low development level and we use future developments and learning curves to project the costs of our six routes up to 2050.

In this supporting information file, we present the methodology behind the techno-economic evaluation of the six electrochemical CO<sub>2</sub> conversion routes. Some supplementary information about the state-of-the-art of the different routes is added in several tables and figures. In the third chapter, the sensitivity analysis of the four routes are presented that are not discussed in the main paper.

## Contents

|     |                                                                                    |    |
|-----|------------------------------------------------------------------------------------|----|
| 1   | Methodology.....                                                                   | 3  |
| 1.1 | System size and configuration .....                                                | 3  |
| 1.2 | Energy and mass balances .....                                                     | 3  |
| 1.3 | Investment costs .....                                                             | 4  |
| 1.4 | Production costs .....                                                             | 4  |
| 1.5 | Cost projections through learning curve analysis.....                              | 5  |
| 1.6 | Environmental greenhouse gas performance.....                                      | 6  |
| 2   | Supplementary state-of-the-art information.....                                    | 7  |
| 2.1 | Chlor-alkali process .....                                                         | 7  |
| 2.2 | Route 1: Low-temperature CO <sub>2</sub> electroconversion to carbon monoxide..... | 8  |
| 2.3 | Route 2: Low-temperature CO <sub>2</sub> electroconversion to formic acid .....    | 8  |
| 2.4 | Route 3: Low-temperature CO <sub>2</sub> electroconversion to ethylene .....       | 10 |
| 2.5 | Route 4: High-temperature CO <sub>2</sub> electroconversion to CO.....             | 10 |
| 2.6 | Route 5: High-temperature CO <sub>2</sub> electroconversion to syngas.....         | 11 |
| 2.7 | High-temperature CO <sub>2</sub> molten carbonate electroconversion .....          | 11 |
| 2.8 | Technology and material summary of the different routes .....                      | 15 |
| 3   | Sensitivity analysis results.....                                                  | 17 |
| 4   | References .....                                                                   | 19 |

# 1 Methodology

For each of the routes we determine the technical status of the involved technology in terms of system size and configuration, technology readiness level (TRL), energy and mass balances, current investment costs, and cumulative installed capacity.

## 1.1 System size and configuration

Today, no commercial CO<sub>2</sub> electroconversion routes are applied and we therefore base our process analysis on a (potential) demonstration facility. This plant at full load (8760 h/yr of operation) has an input capacity of around 1.0 ktCO<sub>2</sub> per year (Figure S1). This scale does approximately match the current development status of our key technology units but not the size of current fossil-based plants that produce for instance syngas or ethylene, which typically deal with feedstock flows that are three orders of magnitude larger (~1000 kt per year) (Petrochemicals Europe, 2022).<sup>1</sup> To accommodate for this mismatch between our six routes and industrial facilities, we assume that scale-up occurs during the development towards TRL 9 and that cost reduction in response to economies-of-scale is an intrinsic element of our technology learning curve. Both the state-of-the-art and the expected rates of development and system scale-up are discussed for each of the key technologies.

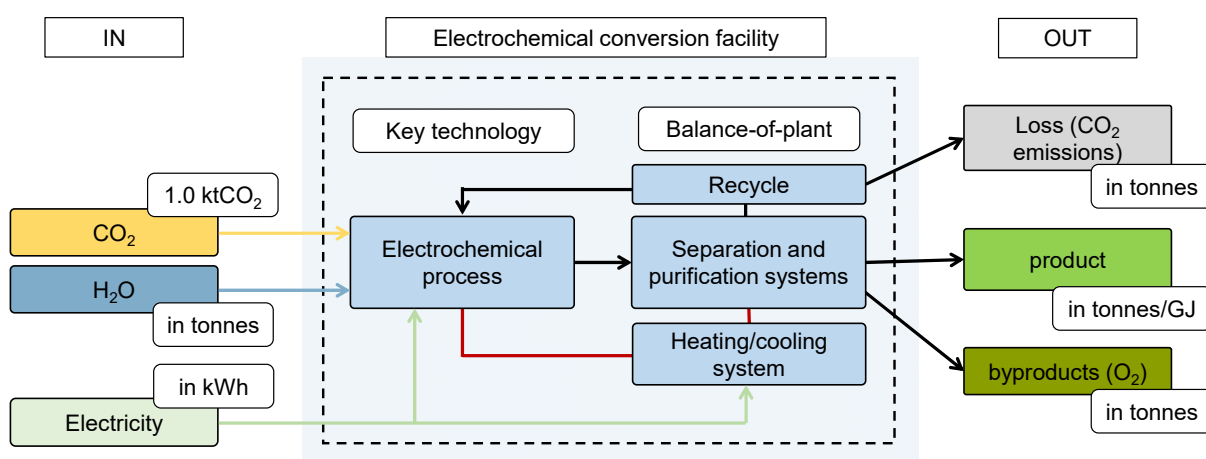

Figure S1. Schematic representation of a CO<sub>2</sub> electrochemical conversion route showing the system boundary (dashed box) and in- and outputs. Upstream CO<sub>2</sub> separation and purification steps are out-of-scope.

## 1.2 Energy and mass balances

The basic configuration as shown in Figure 1 indicates three different input streams: CO<sub>2</sub>, H<sub>2</sub>O, and electricity. If heat or steam is required, we assume it will be provided by an electric heating system, which operates at an efficiency of 95%. For each of the key technologies the stack efficiency is determined by dividing the energy of the desired product (in lower heating value (LHV)) by the electricity consumption of the key technology unit. The total energy efficiency of the route also includes the electricity used for balance-of-plant operation, such as electric heating, powering pumps, and energy use in buildings.

The conversion efficiency of the process is based on carbon in which we divide the amount of carbon in the product by the total amount of carbon in the CO<sub>2</sub> inlet stream (both in moles). Process selectivity, single pass conversion rates, and separation and recycling efficiencies together determine

the losses and byproducts of the route. The portion of carbon that is not converted into the product and cannot be recycled results in a loss category, which includes for instance purge streams that are flared or vented and can result in CO<sub>2</sub> emissions, but also undesirable side products due to poor reaction selectivity. The byproducts category consists of compounds that are formed along with the desired product and cannot be avoided, e.g. oxygen. No value is attributed to the losses and byproducts. As mentioned in the introduction section in the main paper, the source of CO<sub>2</sub> substantially contributes to the sustainability of the approach and the production costs of the different compounds. CO<sub>2</sub> input is considered to be supplied from a circular source, such as from biogenic point sources, waste streams, or direct air capture (DAC). The costs of these sources may vary significantly and we explore their impact in a sensitivity analysis (Table S1).

The energy source to drive the electrochemical CO<sub>2</sub> conversion process is electricity. The origin of this electricity determines largely the sustainability and environmental impact of the routes. Many aspects of the conversion route do rely on assumptions regarding the electricity source, such as the costs of the electricity, the intermittency and amount of full load hours (FLH) of electricity supply, and the CO<sub>2</sub> emission factor of the electricity. To illustrate the dependence on the electricity source, we investigate the electricity costs and amount of FLH in a sensitivity analysis (Table S1). In Section 1.6, we describe how the environmental greenhouse gas (GHG) performance of the different routes were assessed.

### 1.3 Investment costs

The electrochemical conversion facility consists of the core technology unit, for instance a low temperature electrolyser, and the balance-of-plant equipment, such as the purification and heating/cooling systems. The total investment costs (CAPEX) are estimated for a 1.0 ktCO<sub>2</sub>/yr plant and expressed in €(2020) (Table S1). The core technology and balance-of-plant equipment costs are determined based on literature sources (see state-of-the-art chapter in the main paper) and expert judgement and sum up to the direct CAPEX. We apply an installation factor of 2 on top of the direct CAPEX to accommodate for indirect and owners costs, such as for construction, design, engineering, buildings, permits, contingency, etc. (Hydrohub, 2022). Direct and indirect CAPEX combined result in the total installed CAPEX of our plant design. The operating and maintenance (O&M) costs (excl. electricity and CO<sub>2</sub> input) are set at 4% of the total installed CAPEX (typical between 2 and 5% as, e.g., described in Agora (2018) and Detz, *et al.* (2018)).<sup>2,3</sup> Total replacement costs of key technology components are calculated for each of the routes separately, annualized over the total plant lifetime, and added to the O&M costs.

### 1.4 Production costs

The levelized production costs ( $C_x$ ) are calculated with equation (1) in which the total annual costs are divided by the amount of product generated annually ( $P_x$ ) (Blok & Nieuwlaar, 2016).<sup>4</sup> The discounted annualized CAPEX (with  $\alpha$  being the capital recovery factor), the annual O&M costs (including equipment replacement costs), and the annual feedstock costs  $F$  (for CO<sub>2</sub>, electricity and water) represent the total annual costs. The capital recovery factor ( $\alpha$ ) is determined by equation (2) and is a function of the discount rate ( $r$ ) and the plant lifetime ( $n$ ). We here use a typical discount rate of 10% and a plant lifetime of 20 years (based on IEA (2020); Detz, *et al.* (2018))<sup>3,5</sup> and vary these values in the sensitivity analysis. We assume that the operational capacity of the plant in FLH is steady over the plant lifetime. For our base case, the FLH amount to

$$C_x = \frac{\alpha \times \text{CAPEX} + \text{O\&M} + F}{P_x} \quad (1)$$

$$\alpha = \frac{r}{1 - (1 + r)^{-n}} \quad (2)$$

4000, which is based on intermittent renewable electricity supply (e.g. from offshore wind, or a combination of solar and wind parcs), while we explore a range of 2000 to 8000 FLH in the sensitivity analysis. We investigate an electricity cost range of 20 to 60 €/MWh of which 40 €/MWh is our base case value (IEA, 2020).<sup>5</sup> The costs of CO<sub>2</sub> as a feedstock may, depending on the source, vary significantly. Capture of biogenic CO<sub>2</sub> at industrial fermentation processes can provide CO<sub>2</sub> for around 10 €/ton (IEAGHG, 2021a),<sup>6</sup> while direct air capture technology, although currently still expensive, may in the future supply CO<sub>2</sub> for approximately 100-250 €/ton (Keith *et al.*, 2018).<sup>7</sup> We apply for our base case a CO<sub>2</sub> feedstock cost of 50 €/ton, while a broader range (20-150 €/ton) is explored in the sensitivity analysis (Table S1). Water is supplied at 1 €/ton (Agora (2018)).<sup>2</sup> Costs are reported in €(2020), unless otherwise noted. Other currencies are converted to € in the year under consideration, and subsequently corrected for inflation by converting them to our reference year (2020).

Table S1. Parameters for analysis of CO<sub>2</sub> electroconversion routes

| Parameter             | Selected base value | Sensitivity range | Unit                       |
|-----------------------|---------------------|-------------------|----------------------------|
| Production capacity   | 1                   | 1 - 100           | ktCO <sub>2</sub> input/yr |
| Plant lifetime        | 20                  | 15 - 25           | years                      |
| Annual operating time | 4000                | 2000 - 8000       | h/yr                       |
| Discount rate         | 10                  | 5 - 15            | %                          |
| Euro Reference year   | 2020                |                   |                            |
| O&M cost factor       | 4                   | 2 - 6             | % of initial CAPEX         |
| H <sub>2</sub> O      | 1.0                 | 0.5 – 2.0         | €/tH <sub>2</sub> O        |
| CO <sub>2</sub>       | 50                  | 20 - 150          | €/tCO <sub>2</sub>         |
| Electricity           | 40                  | 20 - 60           | €/MWh <sub>e</sub>         |

### 1.5 Cost projections through learning curve analysis

Estimates of today's production costs of our six routes are substantially higher compared to those of conventional processes that generate the same products from fossil resources. The costs of these novel technologies are likely to decline significantly thanks to for instance scale-up, innovation, and learning-by-doing. These overall decline in costs of these phenomena together can be aggregated into a technology learning curve. A technology learning curve provides information on how fast costs (or another metric) decline in relation to the cumulative installed capacity (McDonald & Schrattenholzer, 2001; Ferioli *et al.*, 2009).<sup>8,9</sup> Plotting empirical data of costs versus the cumulative installed capacity on two logarithmic axes generally results in a declining straight line. The slope of this line relates to the learning rate (LR), which specifies the rate (as a percentage) of cost reduction for each doubling in cumulative installed capacity. This relationship can be expressed by equation (3) in which  $C_{X_t}$  represents the costs for a cumulative installed capacity  $X_t$ ,  $C_{X_0}$  the initial costs at the initial cumulative installed capacity  $X_0$ , and  $b$  is the learning parameter from which the LR can be derived via equation (4).

$$C_{X_t} = C_{X_0} \left( \frac{X_t}{X_0} \right)^{-b} \quad (3)$$

$$LR = 1 - 2^{-b} \quad (4)$$

Many technologies, during their deployment, rather steadily follow their learning curve for many decades. Extrapolation of the historical learning curve can, thus, be a valuable tool to estimate future costs of a technology. For novel technologies a learning curve is generally non-existing or is not (yet) determined because barely any cumulative capacity has been installed and cost data is difficult to find. For such a technology, a learning curve can be estimated based on the state-of-the-art and an assumed learning rate. A learning curve (or data) of comparable technologies might provide a good starting point for such assumptions.

We apply learning curve analysis to the direct investment costs of the technologies in our routes. We extrapolate historical learning curves of these technologies or, if no data is available, of comparable technologies to project the cost curves up to at least 2030 for different compound annual growth rates (CAGRs) for the analyzed technologies. We apply a low and high CAGR to explore a range in cumulative installed capacity in 2030. The CAGR values are based on various reported scenarios and existing plans and announcements for (comparable) technology deployment. We do not consider any limitations regarding annual capacity additions due to restrictions in market size of a specific product category because we foresee that until 2030 the share of electrochemical CO<sub>2</sub> conversion capacity remains relatively low compared to conventional capacity. Most of our core technologies are mainly developed for hydrogen or electricity production, i.e. water electrolyzers and solid oxide fuel cells. We postulate that the share of total capacity applied for electrochemical CO<sub>2</sub> conversion is relatively small in 2030. The specific amount of capacity employed for electrochemical CO<sub>2</sub> conversion cannot be deduced from the learning curves but will be discussed separately for each of the routes. We employ our CAPEX learning curves to calculate the future total investment costs (including indirect costs) and levelized production costs. We also project costs up to 2050. Although less reliable due to the many uncertainties regarding the successful scale-up of the conversion routes, such projections illustrate the possible trajectories of technology deployment and related cost reductions.

## **1.6 Environmental greenhouse gas performance**

The sustainability of novel routes to convert CO<sub>2</sub> into various products is determined by their environmental impact over the total value chain. More detailed insight on several impact categories, such as climate change, ozone depletion, acidification, water use, and toxicity, requires extensive life-cycle analysis and is not the focus of this study. Here, we perform an analysis on the CO<sub>2</sub> emissions associated to each route to generate 1 GJ of product based on the emission factor of the electricity supply. The CO<sub>2</sub> feedstock is considered sustainable (i.e. originating from atmosphere, either directly via DAC or via biomass) and does not contribute to net emissions, not even when CO<sub>2</sub> is emitted again during the process via combustion of side products.

For each electrochemical route, we investigate the impact of the emission factor of electricity supply. We explore various levels of a decarbonized electricity: from 0-500 gCO<sub>2</sub>e/kWh and indicate the average grid emission factor in several regions in the world. The carbon intensity of the electrochemical processes is compared with the fossil reference (including end-of-life emissions) in terms of carbon footprint.

## 2 Supplementary state-of-the-art information

### 2.1 Chlor-alkali process

The schematics of the electrolysis cells for both the H<sub>2</sub> co-production and the oxygen depolarised cathode (ODC) system are given in Figure S2. The main particularity of the ODC system is the feeding of a gaseous O<sub>2</sub> stream to the cathode, and the suppression of the hydrogen evolution reaction (HER). The final products of the electrolysis from the ODC system are as well Cl<sub>2</sub> and a concentrated NaOH solution.

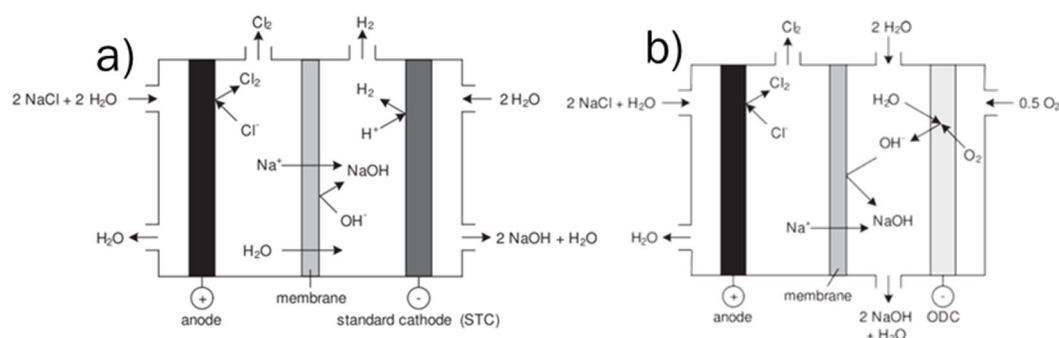

Figure S2. Schematic design and operation of a single electrolysis cell a) with H<sub>2</sub> co-production and ;b) with an Oxygen Depolarised Cathode (ODC), with coupled O<sub>2</sub> consumption (reproduced from Jung *et al.*, 2014).<sup>10</sup>

The complete mass and energy balances of both the H<sub>2</sub> co-production system and the ODC system for the chlor-alkali process are found in Table S2. The final purity of the Cl<sub>2</sub> gas is taken to be 98 vol%, according to Thyssenkrupp (2015).<sup>11</sup>

Table S2. Complete mass and energy balances for the chlor-alkali process, for H<sub>2</sub> co-production (H<sub>2</sub> co-p), and the Oxygen Depolarised Cathode (ODC) systems, based on the production of 1 kg Cl<sub>2</sub>. Data retrieved from Jung *et al.*, 2014 and Eurochlor, 2018.<sup>10,12</sup>

| Flow                        | Unit           | H <sub>2</sub> co-p |           | ODC       |           |   |
|-----------------------------|----------------|---------------------|-----------|-----------|-----------|---|
|                             |                | Input               | Output    | Input     | Output    |   |
| Electricity                 | Stack          | kWh <sub>el</sub>   | 2.40      | -         | 1.75      | - |
|                             | Post-treatment | kWh <sub>el</sub>   | 0.08-2.03 | -         | 0.08-2.03 | - |
|                             | Total          | kWh <sub>el</sub>   | 2.49-4.52 | -         | 1.83-3.87 | - |
|                             |                |                     |           |           |           |   |
| H <sub>2</sub> O            | kg             | 1.65-1.75           | -         | 1.65-1.75 | -         |   |
| NaCl                        | kg             | 1.63-1.70           | -         | 1.63-1.70 | -         |   |
| O <sub>2</sub>              | kg             | -                   | -         | 0.25      | -         |   |
| Cl <sub>2</sub> (>98%vol)   | kg             | -                   | 1         | -         | 1         |   |
| H <sub>2</sub> (>99,9%vol.) | kg             | -                   | 0.03      | -         | -         |   |
| NaOH (aq. 32%wt.)           | kg             | -                   | 1.13      | -         | 1.13      |   |
| NaOH (aq. 50%wt.)           | kg             | -                   | 2.25      | -         | 2.25      |   |

## 2.2 Route 1: Low-temperature CO<sub>2</sub> electroconversion to carbon monoxide

The complete mass and energy balances for the LT electrolysis of CO<sub>2</sub> to CO process is shown in Table S3.

Table S3. Complete mass and energy balances for the LT electrochemical reduction of CO<sub>2</sub> to CO. The category 'Aux.+DSP' corresponds to the energy requirements of the PSA unit for CO purification (data from Jouny *et al.*, 2018)<sup>13</sup> and the calcium caustic recovery loop for the CO<sub>2</sub> recovery in the anode side (data from Keith *et al.*, 2018).<sup>7</sup> CO<sub>2</sub> emissions would correspond to the CO<sub>2</sub> content in the reject stream from the PSA unit.

| Flow                      |          | Unit              | LT-CO     |           |
|---------------------------|----------|-------------------|-----------|-----------|
|                           |          |                   | Input     | Output    |
| Electricity               | Stack    | kWh <sub>el</sub> | 5.68-5.98 | -         |
|                           | Aux.+DSP | kWh <sub>el</sub> | 1.29-1.36 | -         |
|                           | Total    | kWh <sub>el</sub> | 6.97-7.33 | -         |
| CO <sub>2</sub>           |          | kg                | 1.60-1.69 | -         |
| H <sub>2</sub> O          |          | kg                | 0.01      | -         |
| CO (98%vol.)              |          | kg                | -         | 1         |
| O <sub>2</sub>            |          | kg                | -         | 0.58-0.61 |
| CO <sub>2</sub> emissions |          | kg                | -         | 0.00-0.05 |
| H <sub>2</sub>            |          | kg                | -         | 0.00      |

Given the different power density for the water PEM electrolysis and the LT CO<sub>2</sub> electrolysis, the reported values for investment costs for the PEM systems are adapted to the performance indicators for LT CO<sub>2</sub> electrolysis. This can be done with the following equation (5), using the power density for both water PEM electrolysis and LT CO<sub>2</sub> electrolysis, as indicated by Barecka *et al.* (2021)<sup>14</sup>:

$$CAPEX(LT - CO_2) \left[ \frac{\text{€}}{kW_{LT-CO_2}} \right] = CAPEX(PEM) \left[ \frac{\text{€}}{kW_{PEM}} \right] \cdot \frac{PD(PEM) \left[ \frac{kW_{PEM}}{m^2} \right]}{PD(LT-CO_2) \left[ \frac{kW_{LT-CO_2}}{m^2} \right]} \quad (5)$$

## 2.3 Route 2: Low-temperature CO<sub>2</sub> electroconversion to formic acid

The simplified process flow diagram of the purification section of the electrochemical formic acid production process is depicted in Figure S3.



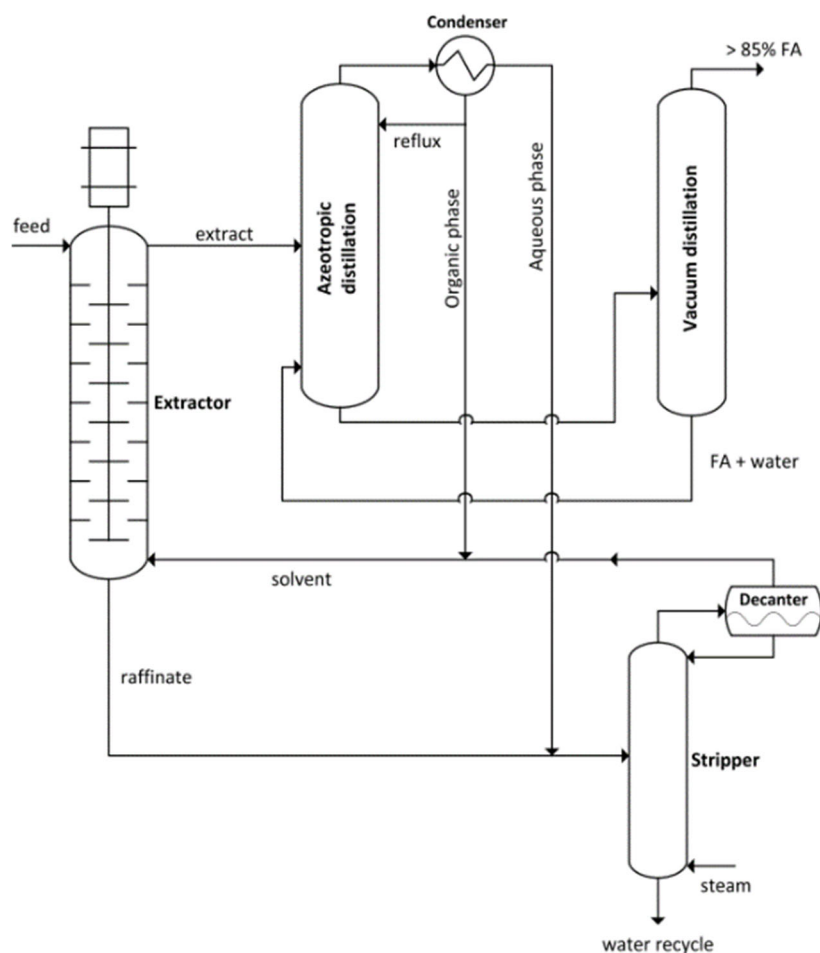

Figure S3. Hybrid extraction + azeotropic distillation strategy for the purification of an aqueous FA solution with a low boiling solvent. In the extractor, this solvent removes FA from water. The extract is sent to an azeotropic distillation column, recovering the azeotrope water-solvent at the top, and a highly concentrated FA stream at the bottom. The top fraction, biphasic, is split into two phases, being the organic phase (rich in solvent) partly recycled back to the azeotropic distillation column, and the rest being sent to a stripper to remove all water, along with the aqueous phase of the azeotropic distillation column. The bottom of this column is sent to a vacuum distillation column, in which an 85%wt. FA solution is recovered at the top. Reproduced from Ramdin *et al.*, 2019.<sup>15</sup>

The complete mass and energy balances for the LT electrolysis of CO<sub>2</sub> to an aq. 85 wt% FA solution process is shown in Table S4.

Table S4. Complete mass and energy balances for the LT electrochemical reduction of CO<sub>2</sub> to FA. The category 'Aux.+DSP' corresponds to the energy requirements of the hybrid extraction and azeotropic distillation for the purification of an aqueous FA stream up to 85 wt% (data from Ramdin *et al.*, 2019).<sup>15</sup>

| Flow             |          | Unit              | LT-FA       |        |
|------------------|----------|-------------------|-------------|--------|
|                  |          |                   | Input       | Output |
| Electricity      | Stack    | kWh <sub>el</sub> | 4.08 – 5.09 | -      |
|                  | Aux.+DSP | kWh <sub>el</sub> | 1.42        | -      |
|                  | Total    | kWh <sub>el</sub> | 5.50 – 6.51 | -      |
| CO <sub>2</sub>  |          | kg                | 0.81        | -      |
| H <sub>2</sub> O |          | kg                | 0.58 – 0.79 | -      |
| FA (85%wt. aq.)  |          | kg                | -           | 1      |

| Flow                      | Unit | LT-FA |             |
|---------------------------|------|-------|-------------|
|                           |      | Input | Output      |
| O <sub>2</sub>            | kg   | -     | 0.33 – 0.41 |
| CO <sub>2</sub> emissions | kg   | -     | -           |
| H <sub>2</sub>            | kg   | -     | 0.00 – 0.01 |

## 2.4 Route 3: Low-temperature CO<sub>2</sub> electroconversion to ethylene

The complete mass and energy balances for the LT electrolysis of CO<sub>2</sub> to C<sub>2</sub>H<sub>4</sub> process is shown in Table S5.

Table S5. Complete mass and energy balances for the LT electrochemical reduction of CO<sub>2</sub> to C<sub>2</sub>H<sub>4</sub>. The category 'Aux.+DSP' corresponds to the energy requirements of the PSA unit for C<sub>2</sub>H<sub>4</sub> purification (data from Jouny *et al.*, 2018a) and the calcium caustic recovery loop for the CO<sub>2</sub> recovery in the anode side (data from Keith *et al.*, 2018). CO<sub>2</sub> emissions would correspond to the CO<sub>2</sub> content in the reject stream from the PSA unit.

| Flow                                     | Unit     | LT-C <sub>2</sub> H <sub>4</sub> |             |             |
|------------------------------------------|----------|----------------------------------|-------------|-------------|
|                                          |          | Input                            | Output      |             |
| Electricity                              | Stack    | kWh <sub>el</sub>                | 75.7 – 79.7 | -           |
|                                          | Aux.+DSP | kWh <sub>el</sub>                | 2.89 – 3.05 | -           |
|                                          | Total    | kWh <sub>el</sub>                | 78.6 – 82.7 | -           |
| CO <sub>2</sub>                          | kg       | 4.62 – 4.78                      | -           | -           |
| H <sub>2</sub> O                         | kg       | 2.85 – 2.92                      | -           | -           |
| C <sub>2</sub> H <sub>4</sub> (99.9%wt.) | kg       | -                                | -           | 1           |
| O <sub>2</sub>                           | kg       | -                                | -           | 5.36 – 5.55 |
| CO <sub>2</sub> emissions                | kg       | -                                | -           | 0.00 – 0.05 |
| CO (side product)                        | kg       | -                                | -           | 0.94        |
| H <sub>2</sub>                           | kg       | -                                | -           | 0.17        |

## 2.5 Route 4: High-temperature CO<sub>2</sub> electroconversion to CO

Table S6 shows the overall mass and energy balance for the CO<sub>2</sub>-SOE CO production route.

Table S6. Complete mass and energy balance for the CO<sub>2</sub>- SOE to CO production.

| Flow        | Unit             |                   |           |   |
|-------------|------------------|-------------------|-----------|---|
|             |                  | Input             | Output    |   |
| Electricity | Stack            | kWh <sub>el</sub> | 2.6 – 2.8 | - |
|             | Balance of plant | kWh <sub>el</sub> | 2.1 - 3.5 | - |
|             | Total            | kWh <sub>el</sub> | 4.7 – 6.3 | - |

| Flow                      | Unit |           |             |
|---------------------------|------|-----------|-------------|
|                           |      | Input     | Output      |
| CO <sub>2</sub>           | kg   | 1.57-1.65 | -           |
| H <sub>2</sub> O          | kg   | -         | -           |
| CO                        | kg   | -         | 1           |
| O <sub>2</sub>            | kg   |           | 0.54 – 0.57 |
| CO <sub>2</sub> emissions | kg   | -         | -           |
| Heat                      | GJ   | -         | -           |

## 2.6 Route 5: High-temperature CO<sub>2</sub> electroconversion to syngas

The overall mass balance for syngas production is given in the Table S7.

Table S7. Complete mass and energy balance for the HT co-electrolysis process for syngas production.

| Flow                                                      | Unit             |                   |                     |   |
|-----------------------------------------------------------|------------------|-------------------|---------------------|---|
|                                                           |                  | Input             | Output <sup>1</sup> |   |
| Electricity                                               | Stack            | kWh <sub>el</sub> | 7.87                | - |
|                                                           | Balance of plant | kWh <sub>el</sub> | 1.04                | - |
|                                                           | Total            | kWh <sub>el</sub> | 8.91                | - |
| CO <sub>2</sub>                                           | kg               | 1.36              | -                   |   |
| H <sub>2</sub> O                                          | kg               | 1.16              | -                   |   |
| Syngas (H <sub>2</sub> /CO)<br>(H <sub>2</sub> :CO = 2:1) | kg               | -                 | 1                   |   |
| O <sub>2</sub>                                            |                  |                   | 1.50                |   |
| CO <sub>2</sub> emissions                                 | kg               | -                 | -                   |   |
| H <sub>2</sub>                                            | kg               | -                 |                     |   |
| Heat                                                      | GJ               | -                 | -                   |   |

<sup>1</sup> Schreiber *et al.*, 2020<sup>16</sup>

## 2.7 High-temperature CO<sub>2</sub> molten carbonate electroconversion

Molten Carbonate Electrolysis Cell (MCEC) is a high temperature electroconversion technology (600-900°C) able to produce carbon monoxide (CO) or syngas (CO/H<sub>2</sub>) (Hu, 2016). MCEC operating concept is based on the reversible operation of Molten Carbonate Fuel Cell (MCFC) technology, where the direction of the redox reactions is inverted (Figure S4). CO and syngas can respectively be produced by electrochemical conversion in a molten carbonate salt electrolyte (CO<sub>3</sub><sup>2-</sup>) by feeding CO<sub>2</sub> or a mixture of steam and CO<sub>2</sub> streams at the fuel electrode (Monforti Ferrario *et al.*, 2021).<sup>17</sup>

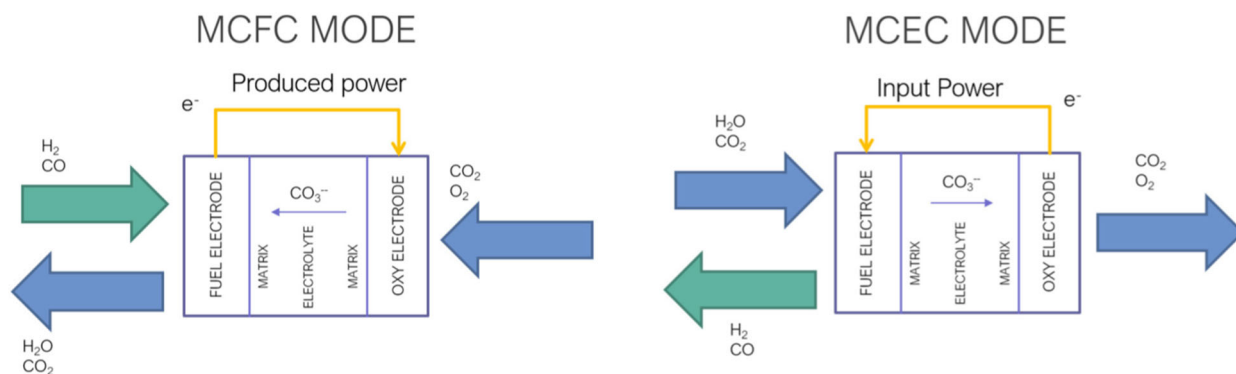

Figure S4. Scheme of the two operation modes of a Molten Carbonate Cells (MCC): (Right) MCC in the electrolysis (MCEC) mode and (Left) MCC in the FC (MCFC) mode (Monforti Ferrario *et al.*, 2021).<sup>17</sup>

The MCEC technology has seen an increase of its development in the last few years, demonstrating the feasibility of both CO and syngas production processes at the lab-scale level (TRL 2-3), with experiments using button cells (Kaplan *et al.*, 2010; Kaplan *et al.*, 2014),<sup>18,19</sup> planar single cells (Hu, 2016; Hu *et al.*, 2014; Meskine *et al.*, 2021),<sup>20,21,22</sup> and numerical models (Perez-Trujillo *et al.*, 2018; Perez-Trujillo *et al.*, 2020).<sup>23,24</sup> An overview of the MCEC operating conditions and performance are presented in Table S8.

Table S8. Overview of MCEC systems properties for CO and syngas production.

|                                          | Unit                                 | CO production <sup>1</sup>                                                | Syngas production <sup>2</sup>                                                                                                                                                 |
|------------------------------------------|--------------------------------------|---------------------------------------------------------------------------|--------------------------------------------------------------------------------------------------------------------------------------------------------------------------------|
| <b>Fuel electrode reactions</b>          |                                      | $2\text{CO}_2 + 2\text{e}^- \rightarrow \text{CO}_2^{3-} + \text{CO}$     | $\text{H}_2\text{O} + \text{CO}_2 + 2\text{e}^- \rightarrow \text{CO}_3^{2-} + \text{H}_2$<br>$\text{CO}_2 + \text{H}_2 \leftrightarrow \text{H}_2\text{O} + \text{CO}$ (RWGS) |
| <b>Oxygen electrode reactions</b>        |                                      | $\text{CO}_2^{3-} \rightarrow \text{CO}_2 + 1/2 \text{O}_2 + 2\text{e}^-$ | $\text{CO}_2^{3-} \rightarrow \text{CO}_2 + 1/2 \text{O}_2 + 2\text{e}^-$                                                                                                      |
| <b>Operating temperature</b>             | °C                                   | 900                                                                       | 600-680°C                                                                                                                                                                      |
| <b>Current density</b>                   | A/m <sup>2</sup>                     | 1000                                                                      | 1000 – 1600                                                                                                                                                                    |
| <b>Cell voltage</b>                      | V                                    | 0.87                                                                      | 1.15 - 1.4                                                                                                                                                                     |
| <b>Faradaic efficiency</b>               | -                                    | 100%                                                                      | 100%                                                                                                                                                                           |
| <b>CO<sub>2</sub> utilisation degree</b> | mole product/mole CO <sub>2</sub> in | 85%                                                                       | 80%                                                                                                                                                                            |
| <b>Power density</b>                     | kW/m <sup>2</sup>                    | 0.87                                                                      | 1.12 – 2.24                                                                                                                                                                    |

<sup>1</sup> Based on: Kaplan *et al.*, 2010<sup>18</sup>; Kaplan *et al.*, 2014<sup>19</sup>; Küngas, 2020<sup>25</sup>. <sup>2</sup> Based on: Monforti Ferrario *et al.*, 2021<sup>17</sup>; Kaplan *et al.*, 2010<sup>18</sup>; Kaplan *et al.*, 2014<sup>19</sup>.

The MCEC concept used for **syngas production** is based on the same system components as those used for the MCFC operating at in the temperature range of 600-680°C. In the reference studies on the topic (Hu, 2016; Monforti Ferrario *et al.*, 2021; Kaplan *et al.*, 2014),<sup>21,17,19</sup> the fuel electrode is made of porous nickel and/or alloyed with Cr and/or Al, the oxygen electrode of porous lithiated nickel oxide (NiO) and an electrolyte composed of a eutectic mixture of lithium, potassium, and/or sodium carbonate (Li<sub>2</sub>CO<sub>3</sub>, K<sub>2</sub>CO<sub>3</sub>, and Na<sub>2</sub>CO<sub>3</sub>), which remains liquid at the operating temperature (600-680°C). A porous matrix, commonly made of g-LiAlO<sub>2</sub>, is used to retain the electrolyte, besides conducting the carbonate ions between the electrodes as well as separating the fuel and oxidant gases. A MCEC system based on this concept can operate at current density of 0.1 to 0.16 A/cm<sup>2</sup> for

operating voltage between 1.15V and 1.4V, but the production of CO is rather limited (max 3%), about 30% of the CO<sub>2</sub> is converted to CH<sub>4</sub>. (Monforti Ferrario *et al.*, 2021).<sup>17</sup>

For **CO production**, the reversible MCFC technology based on Ni electrodes or Li-Na-K carbonate eutectic electrolytes was demonstrated to not be suitable under MCEC operations for this application (Kaplan *et al.*, 2010; Kaplan *et al.*, 2014).<sup>18,19</sup> The Ni fuel electrode used in MCFC systems was shown to coke almost instantaneously and a mixture of alkali metals subsequently intercalates the resulting surface graphite layer, leading to complete deactivation of the electrode. An alternative concept of MCEC technology for CO production, based on molten Li<sub>2</sub>O/Li<sub>2</sub>CO<sub>3</sub> electrolyte, a titanium fuel electrode and a graphite oxygen electrode has been shown to give promising results. The new concept operating at higher temperature (900°C) is able to deliver an efficiency of 85% at 0.1A/cm<sup>2</sup> for an operating voltage of 0.87V.

Regarding MCEC system integration, a system integration analysis at 1 MWe system scale has been carried out by Monforti Ferrario *et al.* (2021) in 2021 to integrate MCEC technology for the decarbonization of the reforming process of an oil refinery factory.<sup>17</sup> The integrated system design presented in Figure S5: Integrated system scheme and effects of the MCEC unit on a plant scheme (Monforti Ferrario *et al.*, 2021).<sup>17</sup>, aims to reuse 10-25% of the plant reformer off-gas in the MCEC stack, with intermediate gas processing with a PSA unit to achieve an equimolar H<sub>2</sub>O:CO<sub>2</sub> ratio at the inlet of the MCEC stack needed for syngas production (Table S8). To optimize the efficiency of the system, a recycling of the off gas on the fuel outlet of the MCEC is aimed and the CO<sub>2</sub> stream outlet on the oxygen electrode side is also used for a process of Oxy-combustion integrated in the overall reforming process of the plant. With the MCEC stack integration with the following stack characteristics (650°C, 0.15 A/cm<sup>2</sup>, 80% fuel utilization, 1 MWe, 490 m<sup>2</sup> cell area), several beneficial effects results for the operation of the refinery plant. The H<sub>2</sub> yield is increased by 3.06% with the recirculation of around 10% of the upgraded off-gas and an increase in the hydrogen yield up to 12% can be potentially achieved by increasing the installed power of the MCEC unit (4 MWe) to process the totality of the off-gas. The off-gas flow to the combustor is reduced by 7.93% at constant heat duty at the reformer combustor by increase of the integrated system efficiency (LHV of the upgraded off-gas). The MCEC integration also contribute to the reduction of CO<sub>2</sub> emissions with CO<sub>2</sub> reuse in the Oxy-combustion process. Last but not least, an electrochemical Specific Energy Consumption for the H<sub>2</sub> production of 3.24 kWh/Nm<sup>3</sup> H<sub>2</sub>, which is a promising value in comparison with the competing low-temperature electrolysis technologies (between 5 and 6 kWh/Nm<sup>3</sup> H<sub>2</sub>).

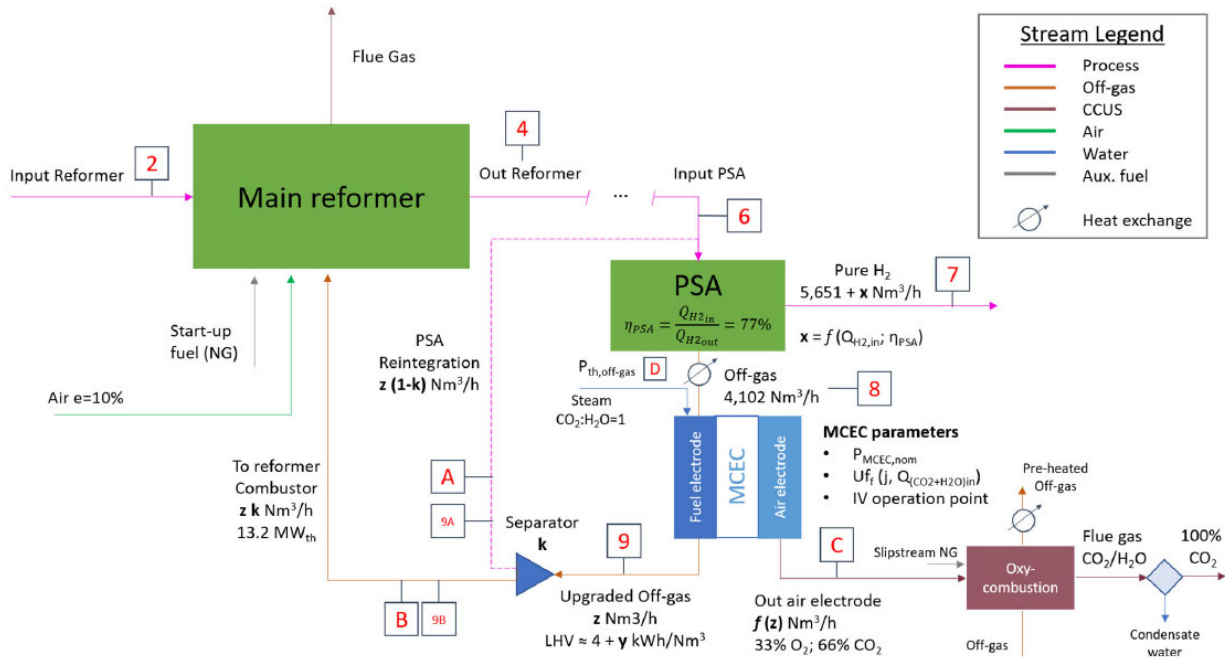

Figure S5: Integrated system scheme and effects of the MCEC unit on a plant scheme (Monforti Ferrario *et al.*, 2021).<sup>17</sup>

### Route 6: Tandem electroconversion approach to produce ethylene

Table S9. Complete mass and energy balances for the tandem route for the combination of HT CO production and LT CO conversion to C<sub>2</sub>H<sub>4</sub>. The energy requirements corresponding to the HT step ('HT'), both for the stack and for the auxiliaries, are referred to the production of 1 final kg C<sub>2</sub>H<sub>4</sub>. The category 'CO (HT intermediate)' is the final CO stream coming from the HT step as input for the LT step. The category 'Aux.+DSP LT' corresponds to the energy requirements of the PSA unit for C<sub>2</sub>H<sub>4</sub> purification (data from Jouny *et al.*, 2018)<sup>13</sup>. 'CO<sub>2</sub> emissions (HT)' would correspond to the CO<sub>2</sub> content in the reject stream from the PSA unit in the HT step. 'CO emissions (LT)' would correspond to the CO content in the reject stream from the PSA unit in the LT step.

| Flow                                         | Unit        | Tandem HT-CO + LT-CO-C <sub>2</sub> H <sub>4</sub> |             |   |
|----------------------------------------------|-------------|----------------------------------------------------|-------------|---|
|                                              |             | Input                                              | Output      |   |
| <b>Electricity</b>                           | Stack HT    | kWh <sub>el</sub>                                  | 4.78 – 5.09 | - |
|                                              | Stack LT    | kWh <sub>el</sub>                                  | 51.1 – 53.8 | - |
|                                              | Aux.+DSP HT | kWh <sub>el</sub>                                  | 3.91 – 6.48 | - |
|                                              | Aux.+DSP LT | kWh <sub>el</sub>                                  | 0.51 – 0.54 | - |
|                                              | Total       | kWh <sub>el</sub>                                  | 60.3 – 65.9 | - |
| <b>CO<sub>2</sub> (HT)</b>                   | kg          | 5.03 – 5.47                                        | -           |   |
| <b>H<sub>2</sub>O (LT)</b>                   | kg          | 5.73 – 5.80                                        | -           |   |
| <b>CO (HT intermediate)</b>                  | kg          | 3.20 – 3.31                                        | -           |   |
| <b>C<sub>2</sub>H<sub>4</sub> (99.9%wt.)</b> | kg          | -                                                  | 1           |   |
| <b>O<sub>2</sub> (HT+LT)</b>                 | kg          | -                                                  | 8.41 – 8.50 |   |
| <b>CO<sub>2</sub> emissions (HT)</b>         | kg          | -                                                  | 0.00 – 0.34 |   |
| <b>CO emissions (LT)</b>                     | kg          | -                                                  | 0.00 – 0.05 |   |
| <b>H<sub>2</sub> (side product LT)</b>       | kg          | -                                                  | 0.37        |   |
| <b>EtOH (side product LT)</b>                | kg          | -                                                  | 0.99        |   |

## 2.8 Technology and material summary of the different routes

The different design aspects and materials used for each technology covered in the state-of-the-art chapter in the paper are summarised in Table S10.

Table S10. Compendium of the materials, catalysts and cell designs used for the different electrochemical routes covered in chapter **Error! Reference source not found.** Disclaimer: CER: Chlorine Evolution Reaction; HER: Hydrogen Evolution Reaction; OER: Oxygen Evolution Reaction; Aq.: aqueous; DI: de-ionised water.

| Route                                              | Cell reactor design                                                                                                                                             | Membrane/separ ator                                                                  | Electrolyte                                                                                                                                                                                                                          | Cathode catalyst material                                                                        | Anode catalyst material                                                                                                                                                                             |
|----------------------------------------------------|-----------------------------------------------------------------------------------------------------------------------------------------------------------------|--------------------------------------------------------------------------------------|--------------------------------------------------------------------------------------------------------------------------------------------------------------------------------------------------------------------------------------|--------------------------------------------------------------------------------------------------|-----------------------------------------------------------------------------------------------------------------------------------------------------------------------------------------------------|
| <b>Chlor-alkali (co-produced H<sub>2</sub>)</b>    | MEA with electrode foams in close contact with membrane <sup>26</sup>                                                                                           | Cation Exchange Membrane for Na <sup>+</sup> crossover                               | <b>Anolyte:</b> concentrated brine (aq. NaCl solution);<br><b>Catholyte:</b> concentrated aq. NaOH solution <sup>27</sup>                                                                                                            | Low-carbon steel; Ni foams for HER <sup>1</sup>                                                  | IrO <sub>2</sub> , RuO <sub>2</sub> for CER<br>Dimensionally Stable Anode (DSA) <sup>27</sup>                                                                                                       |
| <b>Chlor-alkali (ODC)</b>                          | Semi-MEA: DSA foam in contact with membrane; cathode GDE to reduce O <sub>2</sub> <sup>26</sup>                                                                 | Double-layer: sulfonic acid-based layer + carboxylic acid-based layer <sup>27</sup>  |                                                                                                                                                                                                                                      | Ag-based catalyst for ODC <sup>27</sup>                                                          |                                                                                                                                                                                                     |
| <b>LT CO</b>                                       | MEA cell with 2 GDEs and feeding at the back of the electrodes <sup>25</sup>                                                                                    | AEM Sustainion for anion crossover <sup>25</sup>                                     | <b>Anolyte:</b> aq. solution (can be alkaline);<br><b>Catholyte:</b> absent; a humidified gaseous CO <sub>2</sub> stream is fed at the back of the cathode                                                                           | Ag-based catalyst <sup>25</sup>                                                                  | IrO <sub>2</sub> -based catalyst for OER <sup>25</sup>                                                                                                                                              |
| <b>LT FA</b>                                       | 3-compartment cell with 2 membranes and GDEs <sup>28</sup>                                                                                                      | AEM Sustainion (formate crossover) + CEM Nafion (for proton crossover) <sup>28</sup> | <b>Anolyte:</b> aq. solution (can be alkaline);<br><b>Centre compartment electrolyte:</b> DI water taking up produced FA;<br><b>Catholyte:</b> absent; a humidified gaseous CO <sub>2</sub> stream is fed at the back of the cathode | Sn-based catalysts <sup>28</sup> ; Bi <sub>2</sub> O <sub>3</sub> -based catalysts <sup>29</sup> | IrO <sub>2</sub> -based catalyst for OER <sup>25</sup>                                                                                                                                              |
| <b>LT C<sub>2</sub>H<sub>4</sub></b>               | MEA cell with 2 GDEs and feeding at the back of the electrodes <sup>30</sup>                                                                                    | AEM Sustainion for anion crossover <sup>30</sup>                                     | <b>Anolyte:</b> aq. solution (can be alkaline);<br><b>Catholyte:</b> absent; a humidified gaseous CO <sub>2</sub> stream is fed at the back of the cathode                                                                           | Cu-based catalysts <sup>30</sup> ;                                                               | IrO <sub>2</sub> -based catalyst for OER <sup>25</sup>                                                                                                                                              |
| <b>HT CO</b>                                       | Cell with three layers(Cathode, electrolyte, Anode) and one compartment for CO <sub>2</sub> and one compartment for Air <sup>31</sup>                           |                                                                                      | Solid ceramic material such as yttria-stabilized zirconia (YSZ), scandia stabilized zirconia (ScSZ) <sup>3</sup>                                                                                                                     | Ni-YSZ cermet <sup>25</sup>                                                                      | Perovskites materials based on lanthanides and transition metals, such as Sr-doped LaMnO <sub>3</sub> (LSM),Sr-doped La(Fe,Co)O <sub>3</sub> (LSCF),Sr-doped SmCoO <sub>3</sub> (SSC) <sup>25</sup> |
| <b>HT syngas</b>                                   | Cell with three layers(Cathode, electrolyte, Anode) and one compartment for mixed stream of CO <sub>2</sub> and steam and one compartment for Air <sup>31</sup> |                                                                                      | Solid ceramic material such as yttria-stabilized zirconia (YSZ), scandia stabilized zirconia (ScSZ) <sup>25</sup>                                                                                                                    |                                                                                                  | Perovskites materials based on lanthanides and transition metals, such as Sr-doped LaMnO <sub>3</sub> (LSM),Sr-doped La(Fe,Co)O <sub>3</sub> (LSCF),Sr-doped SmCoO <sub>3</sub> (SSC) <sup>25</sup> |
| <b>MC CO</b>                                       | Porous electrode immersed in a molten carbonate salt                                                                                                            |                                                                                      | Electrolyte composed of a eutectic mixture of lithium, potassium, and/or sodium carbonate(Li <sub>2</sub> CO <sub>3</sub> , K <sub>2</sub> CO <sub>3</sub> , and Na <sub>2</sub> CO <sub>3</sub> )                                   | Porous nickel and/or alloyed with Cr and/or Al                                                   | Porous lithiated nickel oxide (NiO)                                                                                                                                                                 |
| <b>Tandem C<sub>2</sub>H<sub>4</sub> (HT-step)</b> | (same as HT-CO)                                                                                                                                                 |                                                                                      |                                                                                                                                                                                                                                      |                                                                                                  |                                                                                                                                                                                                     |

| Route                                                       | Cell reactor design                                                                   | Membrane/separ<br>ator                                      | Electrolyte                                                                                                                                                                                                                                                                        | Cathode<br>catalyst<br>material       | Anode catalyst<br>material                                |
|-------------------------------------------------------------|---------------------------------------------------------------------------------------|-------------------------------------------------------------|------------------------------------------------------------------------------------------------------------------------------------------------------------------------------------------------------------------------------------------------------------------------------------|---------------------------------------|-----------------------------------------------------------|
| <b>Tandem<br/>C<sub>2</sub>H<sub>4</sub> (LT-<br/>step)</b> | MEA cell with 2 GDEs<br>and feeding at the<br>back of the<br>electrodes <sup>32</sup> | CEM Nafion (for<br>Na <sup>+</sup> crossover) <sup>32</sup> | <b>Anolyte:</b> aq. solution (can<br>be alkaline);<br><b>Catholyte:</b> NaOH and<br>other C <sub>2</sub> + products are<br>collected in the 'weep'<br>electrolyte through the<br>membrane; a humidified<br>gaseous CO stream is fed<br>at the back of the<br>cathode <sup>32</sup> | Cu-based<br>catalysts <sup>13</sup> ; | IrO <sub>2</sub> -based catalyst<br>for OER <sup>25</sup> |



### 3 Sensitivity analysis results

To illustrate the dependence of the total production costs on a single parameter, we have performed a sensitivity analysis for each of the routes, starting from the 2020 base case scenario. In Figure S6 to S9, the sensitivity analysis for, respectively, route 2, 3, 5, and 6 is presented.

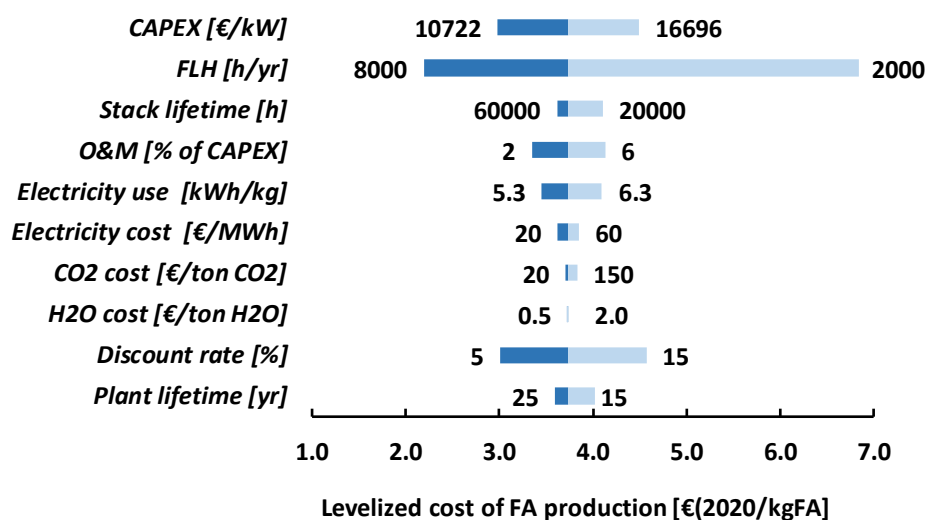

Figure S6. Sensitivity analysis for route 2 – LT electrochemical conversion of CO<sub>2</sub> to FA. Ten parameters are varied to explore their effect on the current levelized cost of formic acid production. The fossil reference formic acid price amounts to 0.70-0.80 €/kgFA.

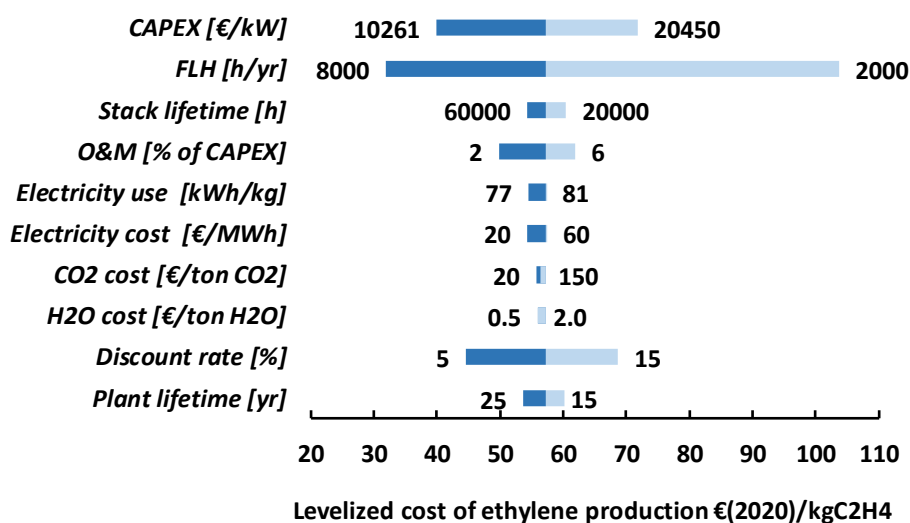

Figure S7. Sensitivity analysis for route 3 – LT electrochemical conversion of CO<sub>2</sub> to C<sub>2</sub>H<sub>4</sub>. Ten parameters are varied to explore their effect on the current levelized cost of ethylene production. The fossil reference ethylene price amounts to 0.70-1.30 €/kgC<sub>2</sub>H<sub>4</sub>.

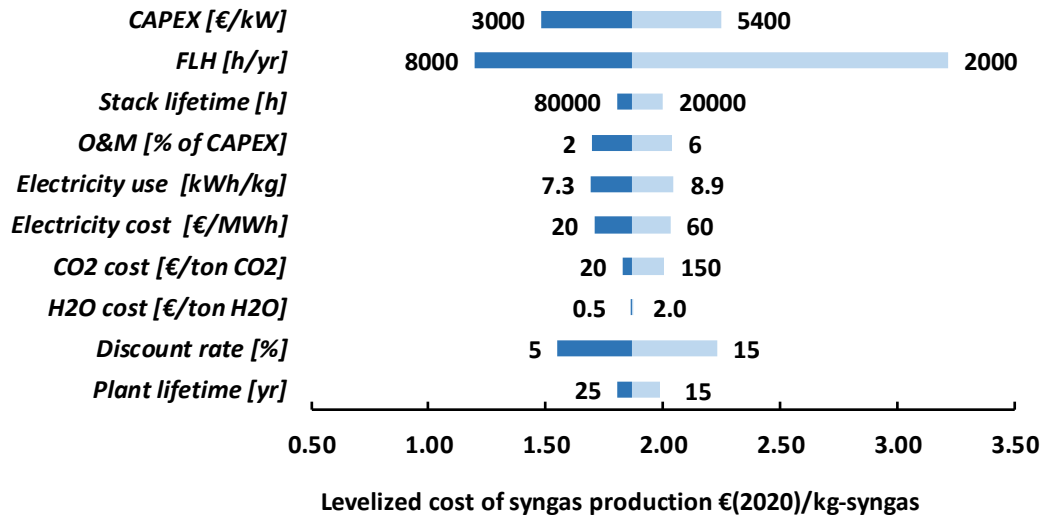

Figure S8. Sensitivity analysis for route 5 – HT electrochemical conversion of CO<sub>2</sub> to syngas. Ten parameters are varied to explore their effect on the current levelized cost of syngas production. The fossil reference syngas price amounts to 0.17-0.43 €/kg syngas.

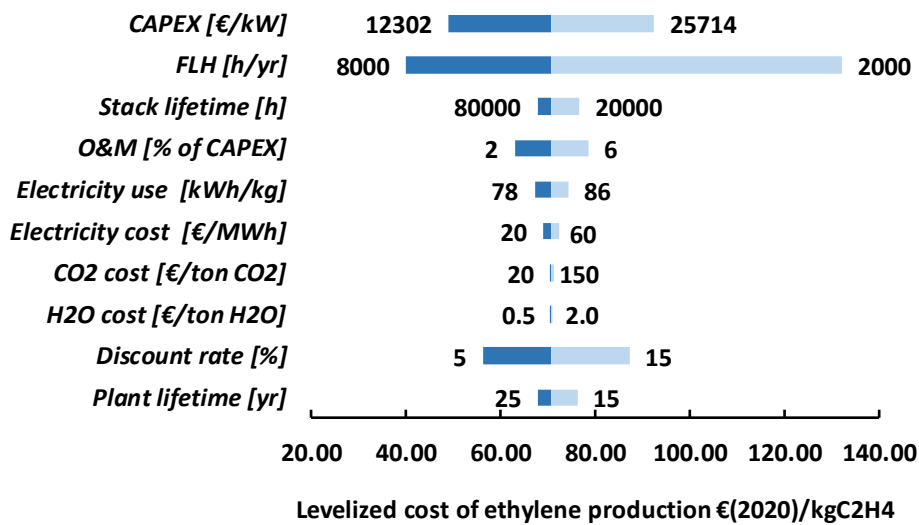

Figure S9. Sensitivity analysis for route 6 – Tandem HT/LT electrochemical conversion of CO<sub>2</sub> to C<sub>2</sub>H<sub>4</sub>. Ten parameters are varied to explore their effect on the current levelized cost of ethylene production. The fossil reference ethylene price amounts to 0.70-1.30 €/kgC<sub>2</sub>H<sub>4</sub>.

## 4 References

- <sup>1</sup> Petrochemicals Europe, 2022. Cracker capacity published on website. Retrieved from: <https://www.petrochemistry.eu/about-petrochemistry/petrochemicals-facts-and-figures/cracker-capacity/>
- <sup>2</sup> Agora Verkehrswende, Agora Energiewende and Frontier Economics, 2018. The Future Cost of Electricity-Based Synthetic Fuels. Retrieved from: <https://www.agora-energiewende.de/en/publications/the-future-cost-of-electricity-based-synthetic-fuels-1/>
- <sup>3</sup> R. J. Detz, J. N. H. Reek and B. C. C. van der Zwaan, *Energy & Environmental Science*, 2018, **11** (7), 1653 - 1669.
- <sup>4</sup> K. Blok and E. Nieuwlaar, 2016. Introduction to Energy Analysis 2nd, Routledge, 2nd edn., 2016.
- <sup>5</sup> International Energy Agency (IEA), 2020. Energy Technology Perspectives 2020. Special Report on Carbon Capture, Utilisation and Storage. Retrieved from: <https://www.iea.org>
- <sup>6</sup> IEAGHG, 2021. CO<sub>2</sub> as a Feedstock: Comparison of CCU Pathways. IEAGHG Technical Report, 2021-02. Retrieved from: <https://www.ieaghg.org/>
- <sup>7</sup> D. W. Keith, G. Holmes, D. St. Angelo and K. Heidel, *Joule*, 2018, **2** (8), 1573–1594. <https://doi.org/10.1016/j.joule.2018.05.006>
- <sup>8</sup> A. McDonald and L. Schrattenholzer, *Energy Policy*, 2001, **29**, 255–261.
- <sup>9</sup> F. Ferioli, K. Schoots, B. C. C. van der Zwaan, *Energy Policy*, 2009, **37**, 2525–2535.
- <sup>10</sup> J. Jung, S. Postels and A. Bardow, *Journal of Cleaner Production*, 2014, **80**, 46–56. <https://doi.org/10.1016/j.jclepro.2014.05.086>
- <sup>11</sup> Thyssenkrupp, 2015. Chlor-Alkali electrolysis plants. Superior membrane process. Retrieved from: [http://www.thyssenkrupp-industrial-solutions-rus.com/assets/pdf/TKIS\\_Chlor-Alkali\\_Electrolysis.pdf](http://www.thyssenkrupp-industrial-solutions-rus.com/assets/pdf/TKIS_Chlor-Alkali_Electrolysis.pdf)
- <sup>12</sup> Eurochlor, 2018. The Electrolysis process and the real costs of production. Retrieved from: [https://www.eurochlor.org/wp-content/uploads/2019/04/12-electrolysis\\_production\\_costs.pdf](https://www.eurochlor.org/wp-content/uploads/2019/04/12-electrolysis_production_costs.pdf)
- <sup>13</sup> M. Jouny, W. Luc and F. Jiao, *Industrial and Engineering Chemistry Research*, 2018, **57** (6), 2165–2177. <https://doi.org/10.1021/acs.iecr.7b03514>
- <sup>14</sup> M. H. Barecka, J. W. Ager and A. A. Lapkin, *STAR Protocols*, 2021, **2** (4), 100889. <https://doi.org/10.1016/j.xpro.2021.100889>
- <sup>15</sup> M. Ramdin, A. R. T. Morrison, M. De Groen, R. van Haperen, R. De Kler, E. Irtem, A. T. Laitinen, L. J. P. van den Broeke, T. Breugelmans, J. P. M. Trusler, W. de Jong and T. J. H. Vlugt, *Industrial and Engineering Chemistry Research*, 2019, **58** (51), 22718–22740. <https://doi.org/10.1021/acs.iecr.9b03970>
- <sup>16</sup> A. Schreiber, A. Peschel, B. Hentschel, and P. Zapp, *Frontiers in Energy Research*, 2020, **8** (November), 1–17. <https://doi.org/10.3389/fenrg.2020.533850>
- <sup>17</sup> A. Monforti Ferrario, F. Santoni, M. Della Pietra, M. Rossi, N. Piacente, G. Comodi and L. Simonetti, *Front. Energy Res.*, 2021, **9**, 655915., doi: 10.3389/fenrg.2021.655915
- <sup>18</sup> V. Kaplan, E. Wachtel, K. Gartsman, Y. Feldman and I. Lubomirsky, *J. Electrochem. Soc.*, 2010, **157** B552
- <sup>19</sup> V. Kaplan, E. Wachtel and I. Lubomirsky, *J. Electrochem. Soc.*, 2014, **161**, F54
- <sup>20</sup> L. Hu, I. Rexed, G. Lindberg and C. Lagergren, *International Journal of Hydrogen Energy*, 2014, **39** (23), 12323-12329
- <sup>21</sup> L. Hu, 2016. Molten Carbonate Fuel Cells for Electrolysis, Doctoral Thesis of KTH Royal Institute of Technology, ISSN 1654-1081, ISBN 978-91-7595-928-3
- <sup>22</sup> H. Meskine, E. Gurbuz, V. Albin, A. Melendez-Ceballos, M., Cassir, A. Ringuedé and V. Lair, *International Journal of Hydrogen Energy*, 2021, **46**, 14913-14921
- <sup>23</sup> J. P. Perez-Trujillo, F. Elizalde-Blancas, S. J. McPhail, M. Della Pietra and B. Bosio, *Appl Energy*, 2020, **263**, 114630.
- <sup>24</sup> J. P. Perez-Trujillo, F. Elizalde-Blancas, M. Della Pietra and S. J. McPhail, *Appl Energy*, 2018, **226**, 1037-1055.
- <sup>25</sup> R. Küngas, *Journal of The Electrochemical Society*, 2020, **167** (4), 044508. <https://doi.org/10.1149/1945-7111/ab7099>
- <sup>26</sup> Thyssenkrupp, 2022. Chlor-Alkali Solutions. Retrieved from: <https://thyssenkrupp-nucera.com/chlor-alkali-solutions/>
- <sup>27</sup> K. Li, Q. Fan, H. Chuai, H. Liu, S. Zhang and X. Ma, *Transactions of Tianjin University*, 2021, **27** (3), 202–216. <https://doi.org/10.1007/s12209-021-00285-9>

- 
- <sup>28</sup> H. Yang, J. J. Kaczur, S. D. Sajjad and R. I. Masel, *Journal of CO<sub>2</sub> Utilization*, 2017, **20** (April), 208–217.  
<https://doi.org/10.1016/j.jcou.2017.04.011>
- <sup>29</sup> H. Yang, J. J. Kaczur, S. D. Sajjad and R. I. Masel, *Journal of CO<sub>2</sub> Utilization*, 2020, **42** (October), 101349.
- <sup>30</sup> C. M. Gabardo, C. P. O'Brien, J. P. Edwards, C. McCallum, Y. Xu, C. T. Dinh, J. Li, E. H. Sargent and D. Sinton, *Joule*, 2019, **3** (11), 2777–2791. <https://doi.org/10.1016/j.joule.2019.07.021>
- <sup>31</sup> A. Hauch, R. Küngas, P. Blennow, A. B. Hansen, J. B. Hansen, B. V. Mathiesen and M. B. Mogensen, *Science*, 2020, **370** (186), eaba6118. doi: 10.1126/science.aba6118
- <sup>32</sup> D. S. Ripatti, T. R. Veltman and M. W. Kanan, *Joule*, 2019, **3** (1), 240–256.  
<https://doi.org/10.1016/j.joule.2018.10.007>
